# Supplementary material for: The Critical Role of Redox Homeostasis in Shikonin-Induced HL-60 Cell Differentiation via Unique Modulation of the Nrf2/ARE Pathway
Source: Hindawi journal article supplement (doi:10.1155/2012/781516), 2012-01-01

# GI<sub>50</sub> Mean Graph for Compound 252844 ( Shikonin)

NCI Cancer Screen Current Data

Average GI<sub>50</sub> over all cell lines is 1.01E-6 M

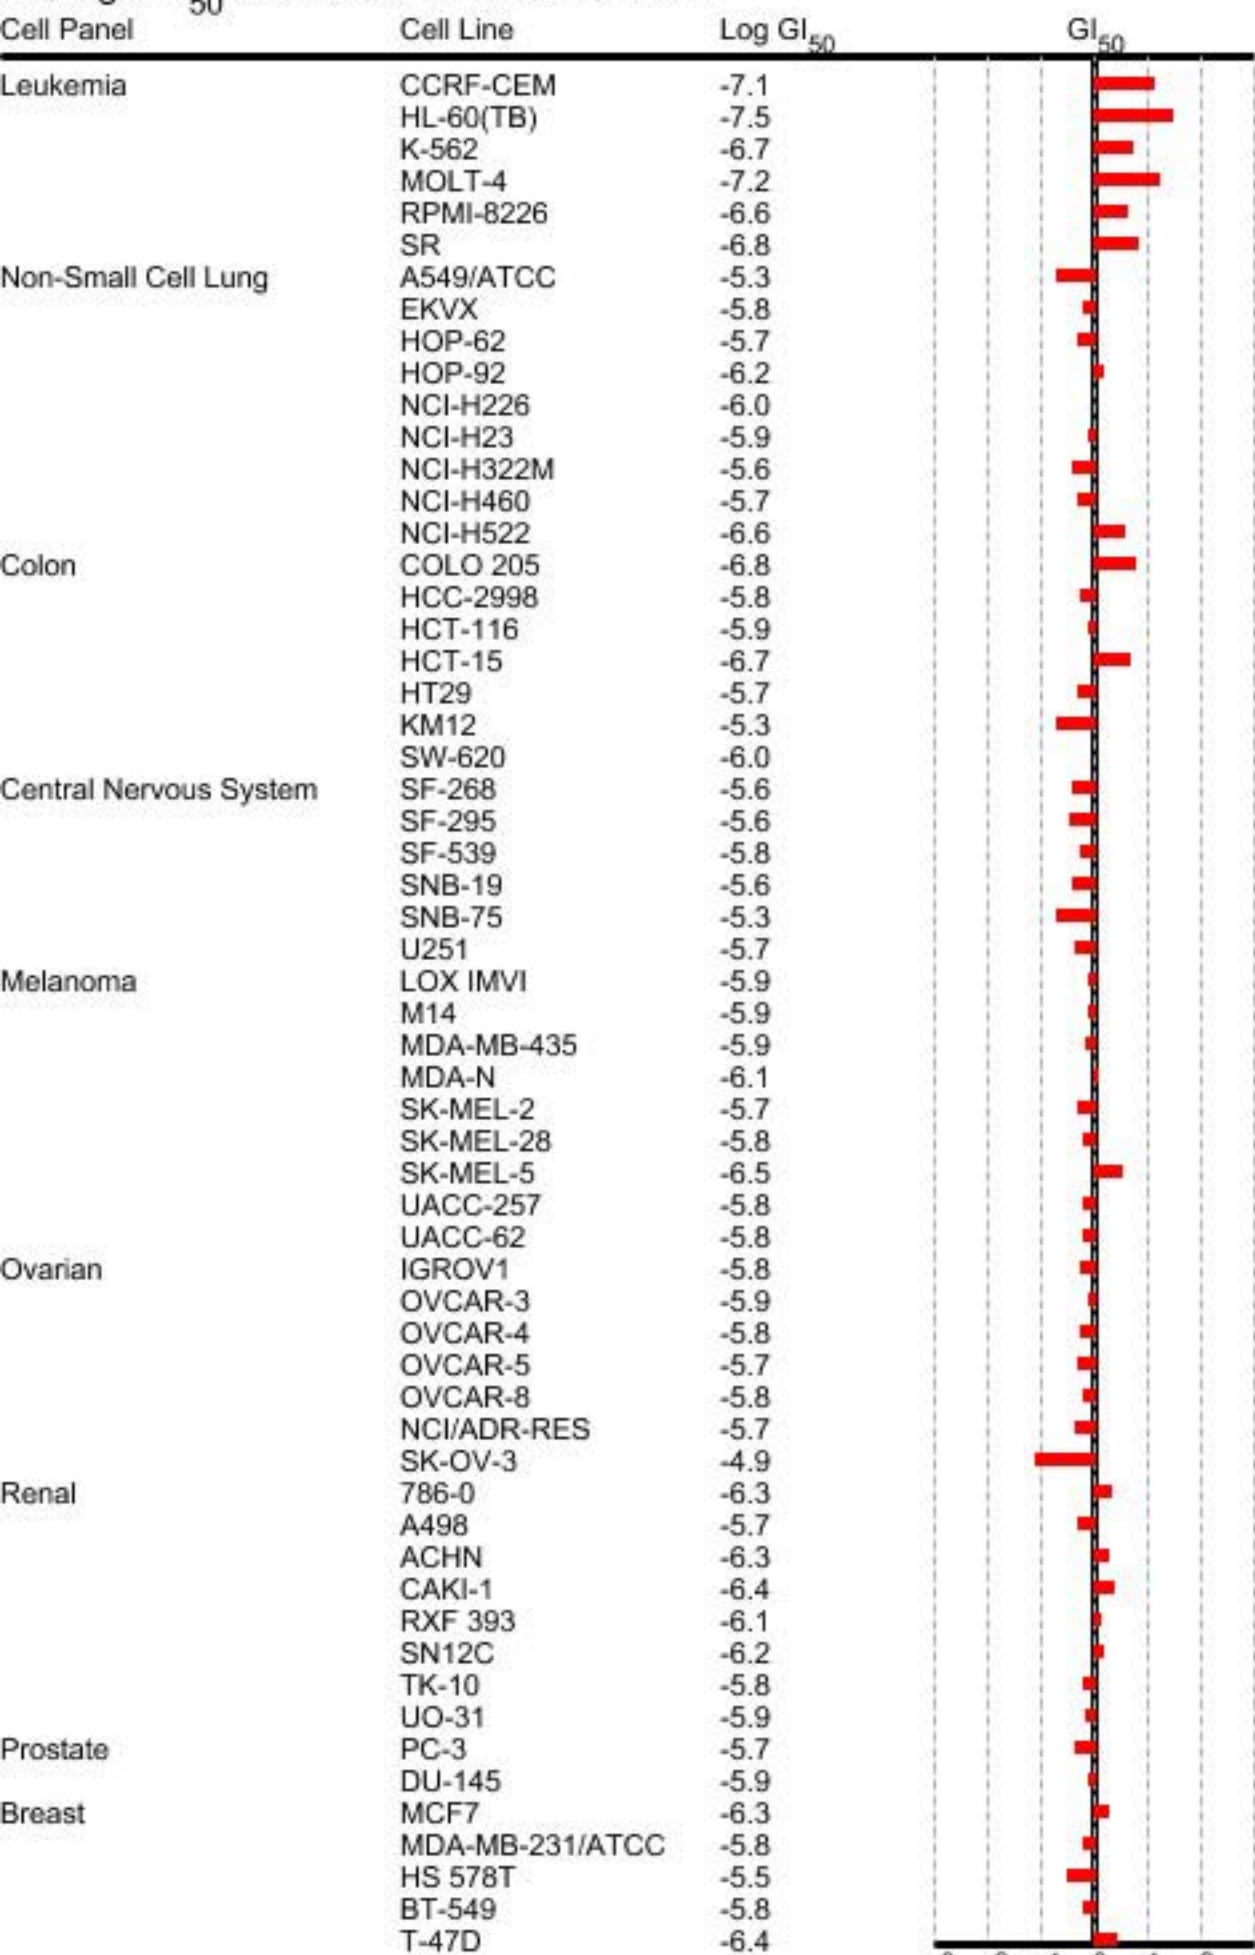

Supplement: f1 [file 781516.f1.pdf]
